# Supplementary material for: Antimicrobial effect of polydopamine coating on Escherichia coli
Source: Royal Society of Chemistry journal article supplement (doi:10.1039/c2jm34825j), 2012-01-01
Supplement: c2jm34825j.pdf [file c2jm34825j.pdf]

## Supplementary Information

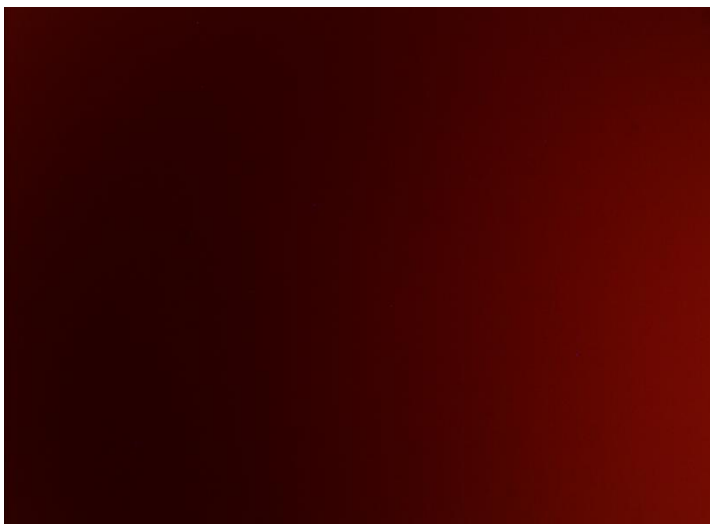

Figure 1. Background fluorescence of quantum dot (QD) following incubation with *E. coli* cells without PDA (high intensity UV light),  $\sim 5 \times 10^{11}$  cells/mL. Cells were incubated with carboxyl functionalized QDs as described in the Experimental section. Magnification = 400 $\times$ .
